# Supplementary material for: Zero-dimensional Cs4EuX6 (X = Br, I) all-inorganic perovskite single crystals for gamma-ray spectroscopy
Source: Royal Society of Chemistry journal article supplement (doi:10.1039/c8tc01458b), 2018-01-01
Supplement: c8tc01458b1.pdf [file c8tc01458b1.pdf]

**Table S1.** Crystal structure data and single-crystal X-ray diffraction refinement results for Cs<sub>4</sub>EuBr<sub>6</sub> and Cs<sub>4</sub>EuI<sub>6</sub>.

| Formula                                               | Cs <sub>4</sub> EuBr <sub>6</sub>                                 | Cs <sub>4</sub> EuI <sub>6</sub>                                  |
|-------------------------------------------------------|-------------------------------------------------------------------|-------------------------------------------------------------------|
| fw (g)                                                | 1163.03                                                           | 1445.01                                                           |
| <i>T</i> (K)                                          | 250(1)                                                            | 250(1)                                                            |
| Crystal system                                        | Trigonal                                                          | Trigonal                                                          |
| space group                                           | $R\bar{3}c$                                                       | $R\bar{3}c$                                                       |
| <i>a</i> (Å)                                          | 13.7406(4)                                                        | 14.5994(2)                                                        |
| <i>b</i> (Å)                                          | 13.7406(4)                                                        | 14.5994(2)                                                        |
| <i>c</i> (Å)                                          | 17.3413(5)                                                        | 18.3443(3)                                                        |
| $\alpha$ (°)                                          | 90                                                                | 90                                                                |
| $\beta$ (°)                                           | 90                                                                | 90                                                                |
| $\gamma$ (°)                                          | 120                                                               | 120                                                               |
| <i>V</i> (Å <sup>3</sup> )                            | 2835.4(13)                                                        | 3386.1(10)                                                        |
| <i>Z</i>                                              | 6                                                                 | 6                                                                 |
| <i>D</i> <sub>calc</sub> (mgm <sup>-3</sup> )         | 4.087                                                             | 4.252                                                             |
| $\mu$ (Mo K $\alpha$ ) (mm <sup>-1</sup> )            | 11.778                                                            | 17.312                                                            |
| <i>F</i> (000)                                        | 2958                                                              | 3606                                                              |
| Crystal size (mm)                                     | 0.2×0.1×0.05                                                      | 0.2×0.15×0.05                                                     |
| $\theta$ range for data collection                    | 3.52-32.59                                                        | 3.41-32.00                                                        |
| Index ranges                                          | -20 ≤ <i>h</i> ≤ 16<br>-19 ≤ <i>k</i> ≤ 20<br>-25 ≤ <i>l</i> ≤ 25 | -21 ≤ <i>h</i> ≤ 21<br>-19 ≤ <i>k</i> ≤ 20<br>-26 ≤ <i>l</i> ≤ 25 |
| No. reflections collected (equivalents agreement)     | 7379(0.025)                                                       | 12517(0.053)                                                      |
| No. reflections collected with $ F_o  > 4\sigma F_o $ | 1002                                                              | 1022                                                              |
| No. of variables                                      | 19                                                                | 20                                                                |
| <i>R</i> <sub><i>F</i></sub>                          | 0.021                                                             | 0.028                                                             |
| <i>R</i> <sub>w<i>F</i></sub>                         | 0.049                                                             | 0.076                                                             |
| Goodness of fit                                       | 1.11                                                              | 1.17                                                              |
| largest diff. peak and hole (eÅ <sup>-3</sup> )       | 0.95, -1.78                                                       | 1.86, -1.84                                                       |

**Table S2.** Fractional atomic coordinates and equivalent isotropic displacement parameters for Cs<sub>4</sub>EuBr<sub>6</sub>.

| Atom | Site | <i>x</i>   | <i>y</i>   | <i>z</i>     | <i>U</i> <sub>eq</sub> (Å <sup>2</sup> ) |
|------|------|------------|------------|--------------|------------------------------------------|
| Eu1  | 6b   | 0          | 0          | 0            | 0.01733(8)                               |
| Cs1  | 6a   | 0          | 0          | -1/4         | 0.03699(14)                              |
| Cs2  | 18e  | 0.03875(2) | 0.70542(2) | 1/12         | 0.02798(8)                               |
| Br1  | 36f  | 0.02775(3) | 0.83628(3) | 0.101204(19) | 0.02696(9)                               |

**Table S3.** Fractional atomic coordinates and equivalent isotropic displacement parameters for Cs<sub>4</sub>EuI<sub>6</sub>.

| Atom | Site | <i>x</i>   | <i>y</i>   | <i>z</i>   | <i>U</i> <sub>eq</sub> (Å <sup>2</sup> ) |
|------|------|------------|------------|------------|------------------------------------------|
| Eu1  | 6b   | 0          | 0          | 0          | 0.02062(16)                              |
| Cs1  | 6a   | 0          | 0          | -1/4       | 0.0423(3)                                |
| Cs2  | 18e  | 0.04371(4) | 0.71037(4) | 1/12       | 0.03349(16)                              |
| I1   | 36f  | 0.03089(3) | 0.83596(3) | 0.10260(2) | 0.03057(15)                              |
